# Supplementary material
Source: publisher figshare collection journal article supplement (https://tandf.figshare.com/articles/dataset/_/3840444)

Supporting information for

**The interaction of beta-lactoglobulin with ciprofloxacin and kanamycin; a spectroscopic and molecular modeling approach**

**Mohammad Hossein Mehraban<sup>a,c</sup>, Salman Odooli<sup>a,d</sup>, Reza Yousefi<sup>e</sup>, Rasoul Roghanian<sup>d</sup>,  
Majid Motovali-Bashi<sup>c</sup>, Ali-Akbar Moosavi-Movahedi<sup>f</sup>, Younes Ghasemi<sup>a,b,\*</sup>**

<sup>a</sup> Pharmaceutical Sciences Research Center, School of Pharmacy, Shiraz University of Medical Sciences, Shiraz, Iran

<sup>b</sup> Department of Pharmaceutical Biotechnology, School of Pharmacy, Shiraz University of Medical Sciences, Shiraz, Iran

<sup>c</sup> Genetics Division, Biology Department, Faculty of Sciences, University of Isfahan, Isfahan, Iran.

<sup>d</sup> Department of Biology, Faculty of Sciences, University of Isfahan, Isfahan, Iran.

<sup>e</sup> Protein Chemistry Laboratory (PCL), Department of Biology, College of Sciences, Shiraz University, Shiraz, Iran

<sup>f</sup> Institute of Biochemistry and Biophysics (IBB), the University of Tehran, Tehran, Iran

\*Corresponding Author: Dr Younes Ghasemi (PhD),

Email: ghasemiy@sums.ac.ir

Phone: +987132426729 Fax: +987132426729

## Section 1

Fig. S1. The absorbance and fluorescence titration curve for different concentrations of Cip (A) and Kana (B).

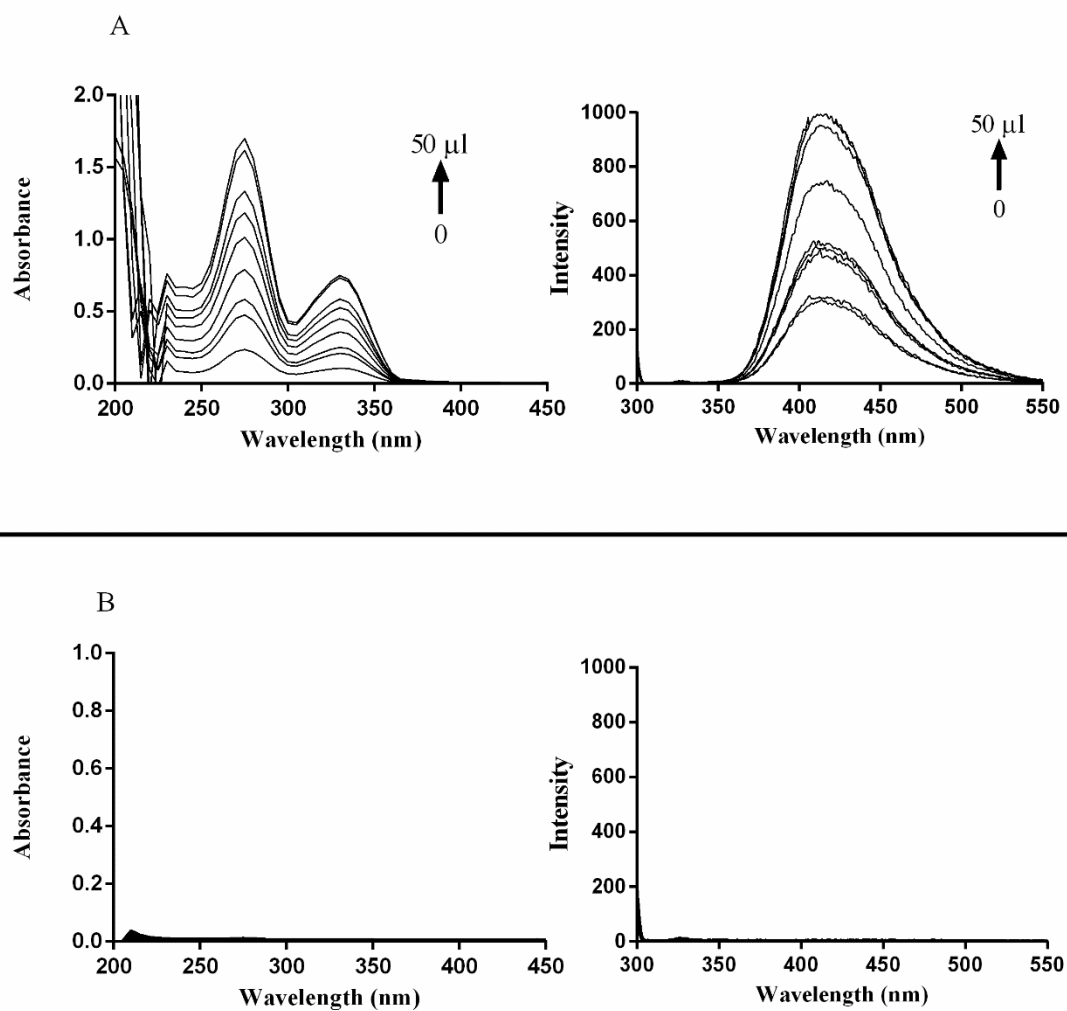

Supplement: Supplementary file 1 [file 1]
