# Supplementary material
Source: publisher figshare collection journal article supplement (https://tandf.figshare.com/articles/dataset/_/3840444)
Supplement: Supplementary file 2 [file 1]

Archive with 2 entries (2 files):
- tbsd_a_1203819_sm1741.docx
- tbsd_a_1203819_sm1740.pdf
