# Supplementary material
Source: publisher figshare collection journal article supplement (https://tandf.figshare.com/articles/dataset/_/3840444)
Supplement: Supplementary file 2 [file 1 › tbsd_a_1203819_sm1741.docx]

Supporting information for

**The interaction of beta-lactoglobulin with ciprofloxacin and kanamycin; a spectroscopic and molecular modeling approach**

**Mohammad Hossein Mehrabana,c, Salman Odoolia,d, Reza Yousefie, Rasoul Roghaniand, Majid Motovali-Bashic, Ali-Akbar Moosavi-Movahedif, Younes Ghasemia,b***

a Pharmaceutical Sciences Research Center, School of Pharmacy, Shiraz University of Medical Sciences, Shiraz, Iran

b Department of Pharmaceutical Biotechnology, School of Pharmacy, Shiraz University of Medical Sciences, Shiraz, Iran

c Genetics Division, Biology Department, Faculty of Sciences, University of Isfahan, Isfahan, Iran.

d Department of Biology, Faculty of Sciences, University of Isfahan, Isfahan, Iran.

e Protein Chemistry Laboratory (PCL), Department of Biology, College of Sciences, Shiraz University, Shiraz, Iran

f Institute of Biochemistry and Biophysics (IBB), the University of Tehran, Tehran, Iran

*Corresponding Author: Dr Younes Ghasemi (PhD),

Email: ghasemiy@sums.ac.ir

Phone: +987132426729 Fax: +987132426729

**Section 1**

Fig. S1. The absorbance and fluorescence titration curve for different concentrations of Cip (A) and Kana (B).
